# Supplementary material
Source: PubMed Central journal article supplement (PMC7737153)
Supplement: jamapediatr-e205142-s001.pdf [file jamapediatr-e205142-s001.pdf]

## Supplementary Online Content

Heitkamp M, Siegrist M, Molnos S, et al. Obesity genes and weight loss during lifestyle intervention in children with obesity. *JAMA Pediatr*. Published online December 14, 2020. doi:10.1001/jamapediatrics.2020.5142

**eTable 1.** Comparison of the Included and Excluded Participants

**eTable 2.** Associations Between the 56 SNPs and Changes in Body Weight Adjusted for Age and Sex During the Intervention

**eTable 3.** Associations Between the 56 SNPs and Changes in BMI Adjusted for Age and Sex During the Intervention

**eTable 4.** Associations Between the 56 SNPs and Changes in BMI-SDS During the Intervention

**eFigure.** Selection and Genotyping of SNPs

This supplementary material has been provided by the authors to give readers additional information about their work.

**eTable 1: Comparison of the included and excluded participants.**

|                 | <b>N</b> | <b>Girls/Boys</b> | <b>Age (years)</b> | <b>Body weight (kg)</b> | <b>BMI (kg/m<sup>2</sup>)</b> | <b>BMI-SDS</b> |
|-----------------|----------|-------------------|--------------------|-------------------------|-------------------------------|----------------|
|                 |          |                   | Mean (SD)          | Mean (SD)               | Mean (SD)                     | Mean (SD)      |
| <b>Included</b> | 1198     | 670/528           | 14.0 (2.2)         | 92.2 (23.1)             | 33.8 (5.8)                    | 2.8 (0.5)      |
| <b>Excluded</b> | 231      | 126/105           | 13.9 (2.4)         | 91.6 (24.7)             | 33.9 (7.1)                    | 2.8 (0.6)      |
| <b>p-Value</b>  |          | p=0.70            | p=0.40             | p=0.72                  | p=0.83                        | p=0.99         |

BMI=body mass index, BMI-SDS=body mass index – standard deviation score, N=number, SD=standard deviation

**eTable 2: Associations between the 56 SNPs and changes in body weight adjusted for age and sex during the intervention (per week).**

| SNP        | Chr | Position    | Effect Allele | Other Allele | $\beta$ -coefficient | Lower CI | Upper CI | p-value | Corr. p-value | Effect Allele Frequency | Gene      | N    |
|------------|-----|-------------|---------------|--------------|----------------------|----------|----------|---------|---------------|-------------------------|-----------|------|
| rs977747   | 1   | 47.457.264  | T             | G            | 0.009                | -0.015   | 0.034    | 0.46    | 1             | 0.421                   | TAL1      | 1197 |
| rs11583200 | 1   | 50.332.407  | C             | T            | -0.015               | -0.04    | 0.009    | 0.22    | 1             | 0.426                   | ELAVL4    | 1188 |
| rs11165643 | 1   | 96.696.685  | T             | C            | 0.003                | -0.021   | 0.027    | 0.80    | 1             | 0.557                   | PTBP2     | 1187 |
| rs17024393 | 1   | 109.956.211 | C             | T            | 0.029                | -0.032   | 0.091    | 0.35    | 1             | 0.072                   | GNAT2     | 1198 |
| rs543874   | 1   | 176.156.103 | G             | A            | -0.02                | -0.049   | 0.01     | 0.19    | 1             | 0.262                   | SEC16B    | 1190 |
| rs10182181 | 2   | 25.003.800  | G             | A            | 0.025                | 0.002    | 0.049    | 0.04    | 1             | 0.483                   | ADCY3     | 1196 |
| rs11126666 | 2   | 26.782.315  | A             | G            | -0.031               | -0.057   | -0.004   | 0.02    | 1             | 0.343                   | KCNK3     | 1190 |
| rs2121279  | 2   | 142.759.755 | T             | C            | -0.03                | -0.066   | 0.005    | 0.09    | 1             | 0.207                   | LRP1B     | 1195 |
| rs1460676  | 2   | 164.275.935 | C             | T            | -0.001               | -0.032   | 0.029    | 0.92    | 1             | 0.26                    | FIGN      | 1198 |
| rs1528435  | 2   | 181.259.207 | T             | C            | -0.033               | -0.058   | -0.008   | 0.01    | 0.51          | 0.603                   | UBE2E3    | 1197 |
| rs17203016 | 2   | 207.963.763 | G             | A            | 0.001                | -0.029   | 0.03     | 0.96    | 1             | 0.278                   | CREB1     | 1194 |
| rs2176040  | 2   | 226.801.046 | A             | G            | 0.017                | -0.008   | 0.043    | 0.19    | 1             | 0.407                   | LOC646736 | 1184 |
| rs6804842  | 3   | 25.081.441  | G             | A            | -0.003               | -0.028   | 0.021    | 0.78    | 1             | 0.574                   | RARB      | 1194 |
| rs2365389  | 3   | 61.211.502  | C             | T            | 0.006                | -0.018   | 0.031    | 0.60    | 1             | 0.571                   | FHIT      | 1189 |
| rs13078960 | 3   | 85.890.280  | G             | T            | 0.032                | 0        | 0.064    | 0.05    | 1             | 0.268                   | CADM2     | 1047 |
| rs1516725  | 3   | 187.306.698 | C             | T            | -0.037               | -0.073   | -0.001   | 0.05    | 1             | 0.813                   | ETV5      | 1193 |
| rs10938397 | 4   | 44.877.284  | G             | A            | -0.025               | -0.049   | -0.001   | 0.04    | 1             | 0.475                   | GNPDA2    | 1180 |
| rs17001654 | 4   | 77.348.592  | G             | C            | -0.019               | -0.05    | 0.012    | 0.23    | 1             | 0.255                   | SCARB2    | 1195 |
| rs13107325 | 4   | 103.407.732 | T             | C            | -0.027               | -0.069   | 0.016    | 0.22    | 1             | 0.139                   | SLC39A8   | 1191 |
| rs11727676 | 4   | 145.878.514 | T             | C            | -0.001               | -0.043   | 0.041    | 0.96    | 1             | 0.85                    | HHIP      | 1197 |

| SNP        | Chr | Position    | Effect Allele | Other Allele | $\beta$ -coefficient | Lower CI | Upper CI | p-value               | Corr. p-value | Effect Allele Frequency | Gene           | N    |
|------------|-----|-------------|---------------|--------------|----------------------|----------|----------|-----------------------|---------------|-------------------------|----------------|------|
| rs205262   | 6   | 34.671.142  | G             | A            | 0.004                | -0.022   | 0.031    | 0.75                  | 1             | 0.35                    | C6orf106       | 1186 |
| rs13201877 | 6   | 137.717.234 | G             | A            | -0.073               | -0.106   | -0.039   | 2.39*10 <sup>-5</sup> | 0.001         | 0.21                    | IFNGR1         | 1184 |
| rs13191362 | 6   | 162.953.340 | A             | G            | -0.023               | -0.061   | 0.015    | 0.24                  | 1             | 0.838                   | PARK2          | 1193 |
| rs1167827  | 7   | 75.001.105  | G             | A            | 0.008                | -0.017   | 0.033    | 0.52                  | 1             | 0.561                   | HIP1           | 1197 |
| rs17405819 | 8   | 76.969.139  | T             | C            | 0.008                | -0.018   | 0.034    | 0.55                  | 1             | 0.65                    | HNF4G          | 1177 |
| rs10968576 | 9   | 28.404.339  | G             | A            | 0.001                | -0.025   | 0.027    | 0.94                  | 1             | 0.371                   | LINGO2         | 1193 |
| rs6477694  | 9   | 110.972.163 | C             | T            | 0.02                 | -0.004   | 0.045    | 0.11                  | 1             | 0.405                   | EPB41L4B       | 1190 |
| rs1928295  | 9   | 119.418.304 | T             | C            | -0.021               | -0.045   | 0.003    | 0.08                  | 1             | 0.538                   | TLR4           | 1190 |
| rs10733682 | 9   | 128.500.735 | A             | G            | -0.041               | -0.065   | -0.018   | 6.37*10 <sup>-4</sup> | 0.04          | 0.516                   | LMX1B          | 1194 |
| rs7899106  | 10  | 87.400.884  | G             | A            | 0.024                | -0.029   | 0.077    | 0.38                  | 1             | 0.09                    | GRID1          | 1159 |
| rs17094222 | 10  | 102.385.430 | C             | T            | 0                    | -0.029   | 0.028    | 0.99                  | 1             | 0.278                   | HIF1AN         | 1190 |
| rs4256980  | 11  | 8.630.515   | G             | C            | -0.014               | -0.039   | 0.01     | 0.26                  | 1             | 0.588                   | TRIM66         | 1194 |
| rs11030104 | 11  | 27.641.093  | A             | G            | -0.017               | -0.046   | 0.012    | 0.25                  | 1             | 0.72                    | BDNF           | 1189 |
| rs3817334  | 11  | 47.607.569  | T             | C            | -0.018               | -0.042   | 0.006    | 0.15                  | 1             | 0.443                   | MTCH2          | 1194 |
| rs12286929 | 11  | 114.527.614 | G             | A            | 0.008                | -0.017   | 0.033    | 0.52                  | 1             | 0.54                    | CADM1          | 1161 |
| rs11170468 | 12  | 37.716.315  | A             | C            | 0.017                | -0.011   | 0.046    | 0.24                  | 1             | 0.7                     | CPNE8          | 1197 |
| rs7138803  | 12  | 48.533.735  | A             | G            | -0.027               | -0.052   | -0.003   | 0.03                  | 1             | 0.45                    | BCDIN3D        | 1191 |
| rs10773049 | 12  | 123.072.584 | C             | T            | -0.021               | -0.046   | 0.004    | 0.10                  | 1             | 0.447                   | ZNF664-FAM101A | 1170 |
| rs12429545 | 13  | 53.000.207  | A             | G            | 0.01                 | -0.025   | 0.044    | 0.58                  | 1             | 0.196                   | OLFM4          | 1177 |
| rs1441264  | 13  | 78.478.920  | A             | G            | -0.007               | -0.032   | 0.018    | 0.57                  | 1             | 0.598                   | MIR548A2       | 1176 |
| rs7164727  | 15  | 70.881.044  | T             | C            | 0.047                | 0.021    | 0.073    | 4.02*10 <sup>-4</sup> | 0.02          | 0.633                   | LOC100287559   | 1194 |
| rs758747   | 16  | 3.567.359   | T             | C            | -0.018               | -0.044   | 0.007    | 0.16                  | 1             | 0.359                   | NLRC3          | 1197 |

| SNP        | Chr | Position   | Effect Allele | Other Allele | $\beta$ -coefficient | Lower CI | Upper CI | p-value               | Corr. p-value | Effect Allele Frequency | Gene   | N    |
|------------|-----|------------|---------------|--------------|----------------------|----------|----------|-----------------------|---------------|-------------------------|--------|------|
| rs12446632 | 16  | 19.842.890 | G             | A            | 0.02                 | -0.017   | 0.057    | 0.30                  | 1             | 0.812                   | GPRC5B | 1191 |
| rs2650492  | 16  | 28.240.912 | A             | G            | -0.016               | -0.042   | 0.009    | 0.21                  | 1             | 0.368                   | SBK1   | 1196 |
| rs3888190  | 16  | 28.796.987 | A             | C            | 0.021                | -0.003   | 0.045    | 0.09                  | 1             | 0.444                   | ATP2A1 | 1187 |
| rs4787491  | 16  | 29.922.838 | G             | A            | -0.018               | -0.042   | 0.006    | 0.14                  | 1             | 0.529                   | INO80E | 1197 |
| rs2080454  | 16  | 47.620.091 | C             | A            | 0.021                | -0.004   | 0.046    | 0.09                  | 1             | 0.422                   | CBLN1  | 1142 |
| rs1000940  | 17  | 5.223.976  | G             | A            | 0.015                | -0.01    | 0.04     | 0.24                  | 1             | 0.375                   | RABEP1 | 1190 |
| rs12940622 | 17  | 76.230.166 | G             | A            | 0.054                | 0.029    | 0.078    | $1.86 \times 10^{-5}$ | 0.001         | 0.565                   | RPTOR  | 1194 |
| rs6567160  | 18  | 55.980.115 | C             | T            | 0.003                | -0.022   | 0.028    | 0.79                  | 1             | 0.368                   | MC4R   | 1194 |
| rs17724992 | 19  | 18.315.825 | A             | G            | -0.034               | -0.062   | -0.007   | 0.02                  | 0.81          | 0.689                   | PGPEP1 | 1183 |
| rs29941    | 19  | 39.001.372 | G             | A            | -0.003               | -0.03    | 0.023    | 0.81                  | 1             | 0.638                   | KCTD15 | 1192 |
| rs2075650  | 19  | 50.087.459 | A             | G            | 0.054                | 0.02     | 0.088    | 0.002                 | 0.11          | 0.777                   | TOMM40 | 1198 |
| rs2287019  | 19  | 50.894.012 | C             | T            | -0.036               | -0.067   | -0.006   | 0.02                  | 0.96          | 0.733                   | QPCTL  | 1189 |
| rs2836754  | 21  | 39.213.610 | C             | T            | -0.047               | -0.072   | -0.023   | $1.51 \times 10^{-4}$ | 0.01          | 0.575                   | ETS2   | 1190 |

Chr=Chromosome, CI=Confidence Interval,  $\beta$ -coefficient= standardized regression coefficient, N=number, SNP= Single nucleotide polymorphism. Effect Allele, for which we provide the effect estimates against the "other allele", which serves as reference (A=Adenosine, G=Guanine, C=Cytosine, T=Thymine). Genes are provided according to Illumina annotation ([http://support.illumina.com/content/dam/illumina-support/documents/downloads/productfiles/cardio-metabochip/metabochip\\_gene\\_annotation.zip](http://support.illumina.com/content/dam/illumina-support/documents/downloads/productfiles/cardio-metabochip/metabochip_gene_annotation.zip)).

**eTable 3: Associations between the 56 SNPs and changes in BMI adjusted for age and sex during the intervention (per week).**

| SNP        | Chr | Position    | Effect Allele | Other Allele | $\beta$ -coefficient | Lower CI | Upper CI | p-value | Corr. p-value | Effect Allele Frequency | Gene      | N    |
|------------|-----|-------------|---------------|--------------|----------------------|----------|----------|---------|---------------|-------------------------|-----------|------|
| rs977747   | 1   | 47.457.264  | T             | G            | 0.004                | -0.004   | 0.013    | 0.33    | 1             | 0.421                   | TAL1      | 1197 |
| rs11583200 | 1   | 50.332.407  | C             | T            | -0.002               | -0.01    | 0.007    | 0.67    | 1             | 0.426                   | ELAVL4    | 1188 |
| rs11165643 | 1   | 96.696.685  | T             | C            | 0                    | -0.008   | 0.009    | 0.91    | 1             | 0.557                   | PTBP2     | 1187 |
| rs17024393 | 1   | 109.956.211 | C             | T            | 0.011                | -0.01    | 0.032    | 0.31    | 1             | 0.072                   | GNAT2     | 1198 |
| rs543874   | 1   | 176.156.103 | G             | A            | -0.006               | -0.016   | 0.004    | 0.25    | 1             | 0.262                   | SEC16B    | 1190 |
| rs10182181 | 2   | 25.003.800  | G             | A            | 0.003                | -0.005   | 0.011    | 0.43    | 1             | 0.483                   | ADCY3     | 1196 |
| rs11126666 | 2   | 26.782.315  | A             | G            | -0.011               | -0.02    | -0.002   | 0.02    | 1             | 0.343                   | KCNK3     | 1190 |
| rs2121279  | 2   | 142.759.755 | T             | C            | -0.005               | -0.017   | 0.007    | 0.45    | 1             | 0.207                   | LRP1B     | 1195 |
| rs1460676  | 2   | 164.275.935 | C             | T            | -0.002               | -0.012   | 0.009    | 0.75    | 1             | 0.26                    | FIGN      | 1198 |
| rs1528435  | 2   | 181.259.207 | T             | C            | -0.008               | -0.017   | 0        | 0.05    | 1             | 0.603                   | UBE2E3    | 1197 |
| rs17203016 | 2   | 207.963.763 | G             | A            | 0.003                | -0.007   | 0.013    | 0.57    | 1             | 0.278                   | CREB1     | 1194 |
| rs2176040  | 2   | 226.801.046 | A             | G            | 0.004                | -0.005   | 0.012    | 0.42    | 1             | 0.407                   | LOC646736 | 1184 |
| rs6804842  | 3   | 25.081.441  | G             | A            | 0.002                | -0.006   | 0.01     | 0.62    | 1             | 0.574                   | RARB      | 1194 |
| rs2365389  | 3   | 61.211.502  | C             | T            | 0.002                | -0.007   | 0.01     | 0.70    | 1             | 0.571                   | FHIT      | 1189 |
| rs13078960 | 3   | 85.890.280  | G             | T            | 0.01                 | -0.001   | 0.021    | 0.06    | 1             | 0.268                   | CADM2     | 1047 |
| rs1516725  | 3   | 187.306.698 | C             | T            | -0.011               | -0.023   | 0.001    | 0.07    | 1             | 0.813                   | ETV5      | 1193 |
| rs10938397 | 4   | 44.877.284  | G             | A            | -0.011               | -0.019   | -0.003   | 0.01    | 0.47          | 0.475                   | GNPDA2    | 1180 |
| rs17001654 | 4   | 77.348.592  | G             | C            | -0.01                | -0.02    | 0.001    | 0.06    | 1             | 0.255                   | SCARB2    | 1195 |
| rs13107325 | 4   | 103.407.732 | T             | C            | -0.007               | -0.022   | 0.007    | 0.32    | 1             | 0.139                   | SLC39A8   | 1191 |
| rs11727676 | 4   | 145.878.514 | T             | C            | -0.004               | -0.019   | 0.01     | 0.56    | 1             | 0.85                    | HHIP      | 1197 |

| SNP        | Chr | Position    | Effect Allele | Other Allele | $\beta$ -coefficient | Lower CI | Upper CI | p-value               | Corr. p-value | Effect Allele Frequency | Gene           | N    |
|------------|-----|-------------|---------------|--------------|----------------------|----------|----------|-----------------------|---------------|-------------------------|----------------|------|
| rs205262   | 6   | 34.671.142  | G             | A            | 0.001                | -0.008   | 0.01     | 0.77                  | 1             | 0.35                    | C6orf106       | 1186 |
| rs13201877 | 6   | 137.717.234 | G             | A            | -0.022               | -0.034   | -0.011   | 1.48*10 <sup>-4</sup> | 0.01          | 0.21                    | IFNGR1         | 1184 |
| rs13191362 | 6   | 162.953.340 | A             | G            | -0.008               | -0.021   | 0.005    | 0.24                  | 1             | 0.838                   | PARK2          | 1193 |
| rs1167827  | 7   | 75.001.105  | G             | A            | 0.004                | -0.004   | 0.012    | 0.36                  | 1             | 0.561                   | HIP1           | 1197 |
| rs17405819 | 8   | 76.969.139  | T             | C            | 0.005                | -0.004   | 0.014    | 0.25                  | 1             | 0.65                    | HNF4G          | 1177 |
| rs10968576 | 9   | 28.404.339  | G             | A            | 0.005                | -0.004   | 0.014    | 0.25                  | 1             | 0.371                   | LINGO2         | 1193 |
| rs6477694  | 9   | 110.972.163 | C             | T            | 0.005                | -0.003   | 0.014    | 0.22                  | 1             | 0.405                   | EPB41L4B       | 1190 |
| rs1928295  | 9   | 119.418.304 | T             | C            | -0.005               | -0.014   | 0.003    | 0.18                  | 1             | 0.538                   | TLR4           | 1190 |
| rs10733682 | 9   | 128.500.735 | A             | G            | -0.013               | -0.021   | -0.005   | 0.001                 | 0.06          | 0.516                   | LMX1B          | 1194 |
| rs7899106  | 10  | 87.400.884  | G             | A            | 0.008                | -0.01    | 0.026    | 0.40                  | 1             | 0.09                    | GRID1          | 1159 |
| rs17094222 | 10  | 102.385.430 | C             | T            | -0.002               | -0.012   | 0.007    | 0.66                  | 1             | 0.278                   | HIF1AN         | 1190 |
| rs4256980  | 11  | 8.630.515   | G             | C            | -0.003               | -0.011   | 0.006    | 0.55                  | 1             | 0.588                   | TRIM66         | 1194 |
| rs11030104 | 11  | 27.641.093  | A             | G            | -0.003               | -0.013   | 0.007    | 0.52                  | 1             | 0.72                    | BDNF           | 1189 |
| rs3817334  | 11  | 47.607.569  | T             | C            | -0.006               | -0.014   | 0.002    | 0.15                  | 1             | 0.443                   | MTCH2          | 1194 |
| rs12286929 | 11  | 114.527.614 | G             | A            | 0.003                | -0.005   | 0.011    | 0.48                  | 1             | 0.54                    | CADM1          | 1161 |
| rs11170468 | 12  | 37.716.315  | A             | C            | 0.007                | -0.003   | 0.016    | 0.19                  | 1             | 0.7                     | CPNE8          | 1197 |
| rs7138803  | 12  | 48.533.735  | A             | G            | -0.006               | -0.015   | 0.002    | 0.14                  | 1             | 0.45                    | BCDIN3D        | 1191 |
| rs10773049 | 12  | 123.072.584 | C             | T            | -0.005               | -0.013   | 0.004    | 0.27                  | 1             | 0.447                   | ZNF664-FAM101A | 1170 |
| rs12429545 | 13  | 53.000.207  | A             | G            | 0.003                | -0.008   | 0.015    | 0.56                  | 1             | 0.196                   | OLFM4          | 1177 |
| rs1441264  | 13  | 78.478.920  | A             | G            | -0.002               | -0.01    | 0.007    | 0.67                  | 1             | 0.598                   | MIR548A2       | 1176 |
| rs7164727  | 15  | 70.881.044  | T             | C            | 0.012                | 0.003    | 0.021    | 0.01                  | 0.38          | 0.633                   | LOC100287559   | 1194 |
| rs758747   | 16  | 3.567.359   | T             | C            | -0.011               | -0.019   | -0.002   | 0.02                  | 0.83          | 0.359                   | NLRC3          | 1197 |

| SNP        | Chr | Position   | Effect Allele | Other Allele | $\beta$ -coefficient | Lower CI | Upper CI | p-value               | Corr. p-value | Effect Allele Frequency | Gene   | N    |
|------------|-----|------------|---------------|--------------|----------------------|----------|----------|-----------------------|---------------|-------------------------|--------|------|
| rs12446632 | 16  | 19.842.890 | G             | A            | 0.007                | -0.006   | 0.019    | 0.29                  | 1             | 0.812                   | GPRC5B | 1191 |
| rs2650492  | 16  | 28.240.912 | A             | G            | 0                    | -0.008   | 0.009    | 0.94                  | 1             | 0.368                   | SBK1   | 1196 |
| rs3888190  | 16  | 28.796.987 | A             | C            | 0.011                | 0.003    | 0.019    | 0.01                  | 0.42          | 0.444                   | ATP2A1 | 1187 |
| rs4787491  | 16  | 29.922.838 | G             | A            | -0.008               | -0.016   | 0        | 0.06                  | 1             | 0.529                   | INO80E | 1197 |
| rs9925964  | 16  | 31.037.396 | A             | G            | -0.008               | -0.016   | 0.001    | 0.08                  | 1             | 0.584                   | KAT8   | 1186 |
| rs2080454  | 16  | 47.620.091 | C             | A            | 0.008                | -0.001   | 0.016    | 0.08                  | 1             | 0.422                   | CBLN1  | 1142 |
| rs1000940  | 17  | 5.223.976  | G             | A            | 0.004                | -0.004   | 0.013    | 0.32                  | 1             | 0.375                   | RABEP1 | 1190 |
| rs12940622 | 17  | 76.230.166 | G             | A            | 0.012                | 0.004    | 0.021    | 0.004                 | 0.23          | 0.565                   | RPTOR  | 1194 |
| rs6567160  | 18  | 55.980.115 | C             | T            | 0                    | -0.008   | 0.009    | 0.93                  | 1             | 0.368                   | MC4R   | 1194 |
| rs17724992 | 19  | 18.315.825 | A             | G            | -0.011               | -0.02    | -0.001   | 0.03                  | 1             | 0.689                   | PGPEP1 | 1183 |
| rs29941    | 19  | 39.001.372 | G             | A            | 0.002                | -0.007   | 0.012    | 0.60                  | 1             | 0.638                   | KCTD15 | 1192 |
| rs2075650  | 19  | 50.087.459 | A             | G            | 0.017                | 0.005    | 0.028    | 0.01                  | 0.26          | 0.777                   | TOMM40 | 1198 |
| rs2287019  | 19  | 50.894.012 | C             | T            | -0.014               | -0.025   | -0.004   | 0.01                  | 0.33          | 0.733                   | QPCTL  | 1189 |
| rs2836754  | 21  | 39.213.610 | C             | T            | -0.015               | -0.024   | -0.007   | $2.84 \times 10^{-4}$ | 0.02          | 0.575                   | ETS2   | 1190 |

Chr=Chromosome, CI=Confidence Interval,  $\beta$ -coefficient= standardized regression coefficient, N=number, SNP= Single nucleotide polymorphism. Effect Allele, for which we provide the effect estimates against the "other allele", which serves as reference (A=Adenosine, G=Guanine, C=Cytosine, T=Thymine). Genes are provided according to Illumina annotation ([http://support.illumina.com/content/dam/illumina-support/documents/downloads/productfiles/cardio-metabochip/metabochip\\_gene\\_annotation.zip](http://support.illumina.com/content/dam/illumina-support/documents/downloads/productfiles/cardio-metabochip/metabochip_gene_annotation.zip)).



**eTable 4: Associations between the 56 SNPs and changes in BMI-SDS during the intervention (per week).**

| SNP        | Chr | Position    | Effect Allele | Other Allele | $\beta$ -coefficient | Lower CI | Upper CI | p-value               | Corr. p-value | Effect Allele Frequency | Gene      | N    |
|------------|-----|-------------|---------------|--------------|----------------------|----------|----------|-----------------------|---------------|-------------------------|-----------|------|
| rs977747   | 1   | 47.457.264  | T             | G            | -0.001               | -0.002   | 0        | 0.15                  | 1             | 0.421                   | TAL1      | 1197 |
| rs11583200 | 1   | 50.332.407  | C             | T            | 0                    | -0.001   | 0.001    | 0.78                  | 1             | 0.426                   | ELAVL4    | 1188 |
| rs11165643 | 1   | 96.696.685  | T             | C            | 0                    | -0.001   | 0.001    | 0.87                  | 1             | 0.557                   | PTBP2     | 1187 |
| rs17024393 | 1   | 109.956.211 | C             | T            | -0.003               | -0.005   | 0        | 0.08                  | 1             | 0.072                   | GNAT2     | 1198 |
| rs543874   | 1   | 176.156.103 | G             | A            | -0.002               | -0.003   | -0.001   | 0.004                 | 0.23          | 0.262                   | SEC16B    | 1190 |
| rs10182181 | 2   | 25.003.800  | G             | A            | -0.001               | -0.002   | 0.001    | 0.35                  | 1             | 0.483                   | ADCY3     | 1196 |
| rs11126666 | 2   | 26.782.315  | A             | G            | 0.001                | 0        | 0.003    | 0.04                  | 1             | 0.343                   | KCNK3     | 1190 |
| rs2121279  | 2   | 142.759.755 | T             | C            | 0.001                | -0.001   | 0.002    | 0.46                  | 1             | 0.207                   | LRP1B     | 1195 |
| rs1460676  | 2   | 164.275.935 | C             | T            | 0                    | -0.001   | 0.002    | 0.65                  | 1             | 0.26                    | FIGN      | 1198 |
| rs1528435  | 2   | 181.259.207 | T             | C            | 0                    | -0.002   | 0.001    | 0.42                  | 1             | 0.603                   | UBE2E3    | 1197 |
| rs17203016 | 2   | 207.963.763 | G             | A            | -0.001               | -0.003   | 0        | 0.08                  | 1             | 0.278                   | CREB1     | 1194 |
| rs2176040  | 2   | 226.801.046 | A             | G            | 0                    | -0.002   | 0.001    | 0.62                  | 1             | 0.407                   | LOC646736 | 1184 |
| rs6804842  | 3   | 25.081.441  | G             | A            | 0.002                | 0.001    | 0.003    | 0.003                 | 0.14          | 0.574                   | RARB      | 1194 |
| rs2365389  | 3   | 61.211.502  | C             | T            | 0.001                | 0        | 0.002    | 0.06                  | 1             | 0.571                   | FHIT      | 1189 |
| rs13078960 | 3   | 85.890.280  | G             | T            | 0.003                | 0.002    | 0.005    | 2.52*10 <sup>-5</sup> | 0.001         | 0.268                   | CADM2     | 1047 |
| rs1516725  | 3   | 187.306.698 | C             | T            | -0.001               | -0.003   | 0.001    | 0.20                  | 1             | 0.813                   | ETV5      | 1193 |
| rs10938397 | 4   | 44.877.284  | G             | A            | 0.001                | 0        | 0.002    | 0.07                  | 1             | 0.475                   | GNPDA2    | 1180 |
| rs17001654 | 4   | 77.348.592  | G             | C            | 0.001                | -0.001   | 0.002    | 0.34                  | 1             | 0.255                   | SCARB2    | 1195 |
| rs13107325 | 4   | 103.407.732 | T             | C            | 0.004                | 0.002    | 0.006    | 1.67*10 <sup>-4</sup> | 0.01          | 0.139                   | SLC39A8   | 1191 |
| rs11727676 | 4   | 145.878.514 | T             | C            | 0                    | -0.002   | 0.002    | 0.98                  | 1             | 0.85                    | HHIP      | 1197 |

| SNP        | Chr | Position    | Effect Allele | Other Allele | $\beta$ -coefficient | Lower CI | Upper CI | p-value               | Corr. p-value | Effect Allele Frequency | Gene           | N    |
|------------|-----|-------------|---------------|--------------|----------------------|----------|----------|-----------------------|---------------|-------------------------|----------------|------|
| rs205262   | 6   | 34.671.142  | G             | A            | 0                    | -0.001   | 0.001    | 0.71                  | 1             | 0.35                    | C6orf106       | 1186 |
| rs13201877 | 6   | 137.717.234 | G             | A            | 0                    | -0.002   | 0.002    | 0.92                  | 1             | 0.21                    | IFNGR1         | 1184 |
| rs13191362 | 6   | 162.953.340 | A             | G            | -0.002               | -0.004   | 0        | 0.02                  | 1             | 0.838                   | PARK2          | 1193 |
| rs1167827  | 7   | 75.001.105  | G             | A            | 0.001                | 0        | 0.003    | 0.01                  | 0.69          | 0.561                   | HIP1           | 1197 |
| rs17405819 | 8   | 76.969.139  | T             | C            | 0.001                | 0        | 0.002    | 0.07                  | 1             | 0.65                    | HNF4G          | 1177 |
| rs10968576 | 9   | 28.404.339  | G             | A            | 0.001                | 0        | 0.002    | 0.04                  | 1             | 0.371                   | LINGO2         | 1193 |
| rs6477694  | 9   | 110.972.163 | C             | T            | -0.001               | -0.002   | 0        | 0.03                  | 1             | 0.405                   | EPB41L4B       | 1190 |
| rs1928295  | 9   | 119.418.304 | T             | C            | -0.001               | -0.002   | 0.001    | 0.36                  | 1             | 0.538                   | TLR4           | 1190 |
| rs10733682 | 9   | 128.500.735 | A             | G            | -0.001               | -0.002   | 0        | 0.12                  | 1             | 0.516                   | LMX1B          | 1194 |
| rs7899106  | 10  | 87.400.884  | G             | A            | 0.001                | -0.001   | 0.004    | 0.36                  | 1             | 0.09                    | GRID1          | 1159 |
| rs17094222 | 10  | 102.385.430 | C             | T            | -0.001               | -0.002   | 0        | 0.16                  | 1             | 0.278                   | HIF1AN         | 1190 |
| rs4256980  | 11  | 8.630.515   | G             | C            | 0                    | -0.002   | 0.001    | 0.45                  | 1             | 0.588                   | TRIM66         | 1194 |
| rs11030104 | 11  | 27.641.093  | A             | G            | 0.001                | 0        | 0.002    | 0.18                  | 1             | 0.72                    | BDNF           | 1189 |
| rs3817334  | 11  | 47.607.569  | T             | C            | 0.001                | 0        | 0.002    | 0.25                  | 1             | 0.443                   | MTCH2          | 1194 |
| rs12286929 | 11  | 114.527.614 | G             | A            | -0.001               | -0.002   | 0        | 0.13                  | 1             | 0.54                    | CADM1          | 1161 |
| rs11170468 | 12  | 37.716.315  | A             | C            | 0.003                | 0.001    | 0.004    | 1.05*10 <sup>-4</sup> | 0.01          | 0.7                     | CPNE8          | 1197 |
| rs7138803  | 12  | 48.533.735  | A             | G            | -0.002               | -0.003   | 0        | 0.01                  | 0.44          | 0.45                    | BCDIN3D        | 1191 |
| rs10773049 | 12  | 123.072.584 | C             | T            | 0.002                | 0        | 0.003    | 0.01                  | 0.55          | 0.447                   | ZNF664-FAM101A | 1170 |
| rs12429545 | 13  | 53.000.207  | A             | G            | -0.002               | -0.003   | 0        | 0.04                  | 1             | 0.196                   | OLFM4          | 1177 |
| rs1441264  | 13  | 78.478.920  | A             | G            | 0.001                | 0        | 0.002    | 0.18                  | 1             | 0.598                   | MIR548A2       | 1176 |
| rs7164727  | 15  | 70.881.044  | T             | C            | 0                    | -0.002   | 0.001    | 0.56                  | 1             | 0.633                   | LOC100287559   | 1194 |

| SNP        | Chr | Position   | Effect Allele | Other Allele | $\beta$ -coefficient | Lower CI | Upper CI | p-value               | Corr. p-value | Effect Allele Frequency | Gene   | N    |
|------------|-----|------------|---------------|--------------|----------------------|----------|----------|-----------------------|---------------|-------------------------|--------|------|
| rs758747   | 16  | 3.567.359  | T             | C            | 0.001                | 0        | 0.002    | 0.09                  | 1             | 0.359                   | NLRC3  | 1197 |
| rs12446632 | 16  | 19.842.890 | G             | A            | 0                    | -0.001   | 0.002    | 0.72                  | 1             | 0.812                   | GPRC5B | 1191 |
| rs2650492  | 16  | 28.240.912 | A             | G            | 0.001                | -0.001   | 0.002    | 0.33                  | 1             | 0.368                   | SBK1   | 1196 |
| rs3888190  | 16  | 28.796.987 | A             | C            | 0.002                | 0        | 0.003    | 0.01                  | 0.51          | 0.444                   | ATP2A1 | 1187 |
| rs4787491  | 16  | 29.922.838 | G             | A            | 0                    | -0.001   | 0.001    | 0.82                  | 1             | 0.529                   | INO80E | 1197 |
| rs9925964  | 16  | 31.037.396 | A             | G            | -0.002               | -0.003   | -0.001   | 3.48*10 <sup>-4</sup> | 0.02          | 0.584                   | KAT8   | 1186 |
| rs2080454  | 16  | 47.620.091 | C             | A            | -0.001               | -0.002   | 0.001    | 0.33                  | 1             | 0.422                   | CBLN1  | 1142 |
| rs1000940  | 17  | 5.223.976  | G             | A            | 0.001                | 0        | 0.002    | 0.05                  | 1             | 0.375                   | RABEP1 | 1190 |
| rs12940622 | 17  | 76.230.166 | G             | A            | 0                    | -0.002   | 0.001    | 0.42                  | 1             | 0.565                   | RPTOR  | 1194 |
| rs6567160  | 18  | 55.980.115 | C             | T            | 0                    | -0.001   | 0.002    | 0.41                  | 1             | 0.368                   | MC4R   | 1194 |
| rs17724992 | 19  | 18.315.825 | A             | G            | 0.001                | -0.001   | 0.002    | 0.31                  | 1             | 0.689                   | PGPEP1 | 1183 |
| rs29941    | 19  | 39.001.372 | G             | A            | 0.002                | 0        | 0.003    | 0.02                  | 0.83          | 0.638                   | KCTD15 | 1192 |
| rs2075650  | 19  | 50.087.459 | A             | G            | 0.001                | 0        | 0.003    | 0.10                  | 1             | 0.777                   | TOMM40 | 1198 |
| rs2287019  | 19  | 50.894.012 | C             | T            | 0                    | -0.001   | 0.002    | 0.72                  | 1             | 0.733                   | QPCTL  | 1189 |
| rs2836754  | 21  | 39.213.610 | C             | T            | -0.001               | -0.002   | 0        | 0.08                  | 1             | 0.575                   | ETS2   | 1190 |

Chr=Chromosome, CI=Confidence Interval,  $\beta$ -coefficient= standardized regression coefficient, N=number, SNP= Single nucleotide polymorphism. Effect Allele, for which we provide the effect estimates against the "other allele", which serves as reference (A=Adenosine, G=Guanine, C=Cytosine, T=Thymine). Genes are provided according to Illumina annotation ([http://support.illumina.com/content/dam/illumina-support/documents/downloads/productfiles/cardio-metabochip/metabochip\\_gene\\_annotation.zip](http://support.illumina.com/content/dam/illumina-support/documents/downloads/productfiles/cardio-metabochip/metabochip_gene_annotation.zip)).

**eFigure: Selection and genotyping of SNPs.**

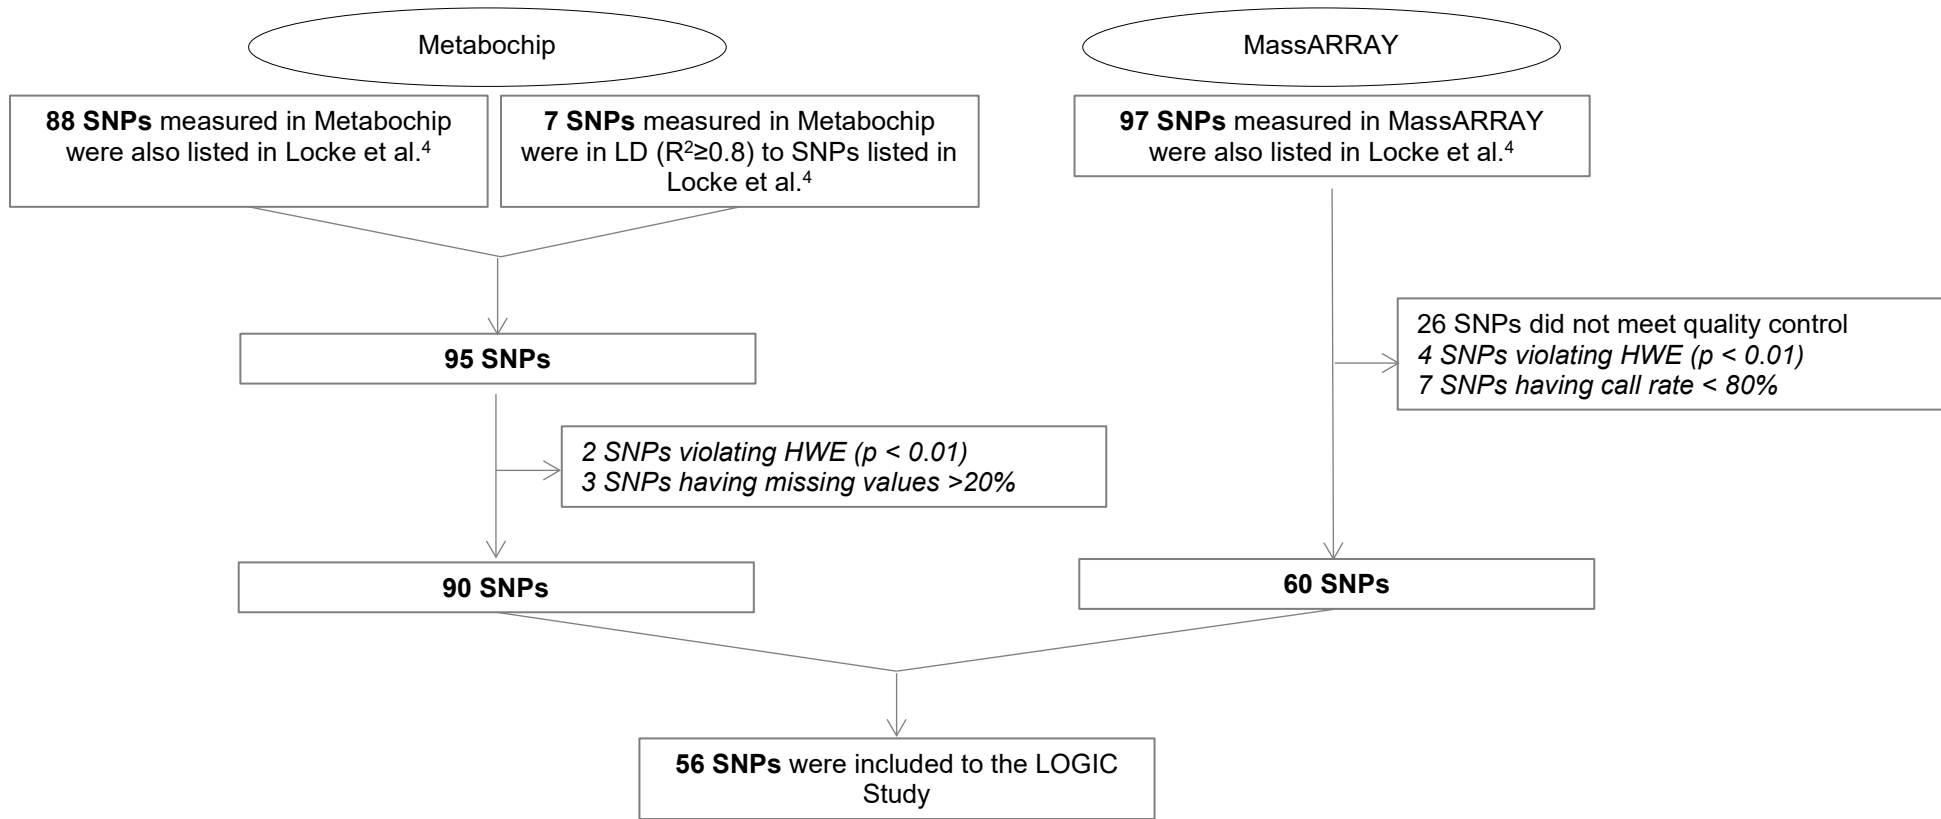

HWE=Hardy Weinberg Equilibrium, LD=Linkage disequilibrium, SNP=Single nucleotide polymorphism.
